# Supplementary material for: Galectin-8 in IgA Nephritis: Decreased Binding of IgA by Galectin-8 Affinity Chromatography and Associated Increased Binding in Non-IgA Serum Glycoproteins
Source: Springer Nature journal article supplement (doi:10.1007/s10875-011-9618-3), 2011-12-15
Supplement: MOESM4 [file 8907466]

**Table SIII. Calculated concentration ( $\mu\text{g/ml}$  serum) of proteins found in galectin-8N bound fractions<sup>a,b</sup>**

| <b>Protein</b>                                                               | <b>H2</b>   | <b>K2</b>  | <b>P2</b>   | <b>P4</b>   | <b>Av. % bound</b> |
|------------------------------------------------------------------------------|-------------|------------|-------------|-------------|--------------------|
| IgA1                                                                         | <b>1300</b> | <b>900</b> | <b>500</b>  | <b>2100</b> | 20.1               |
| Ig M1 (unkn sp P01871-1 IGHM_HUMAN isoform; 17394026)                        | <u>50</u>   | <u>75</u>  | 14          | 12          | 3.8                |
| Ig G3 (pir  A23511; 524049)                                                  | 22          | 11         | 6           | 5           | 1.7                |
| Ig G1 (sp P01857 IGHG1_HUMAN; 444992)                                        | 31          | 107        | 10          | 11          | 0.5                |
| IgA2 (unkn IPI:IPI00641229.4 SW Tax_Id=9606; 17522711)                       | 0           | 1          | 0           | 1           | 0.1                |
| Haptoglobin (sp P00738 HPT_HUMAN; 444784)                                    | <b>458</b>  | <b>320</b> | <b>2737</b> | <b>224</b>  | 65.4               |
| inter-alpha trypsin inhibitor H2 (ref NP_002207.2 ; 2690)                    | <b>49</b>   | <u>12</u>  | <b>129</b>  | <b>78</b>   | 31.9               |
| Alpha-2-macroglobulin (sp P01023 A2MG_HUMAN; 392778)                         | <b>405</b>  | <b>159</b> | <b>640</b>  | <b>393</b>  | 28.5               |
| Hemoglobin Chain B (pdb 1DXT B; 3927)                                        | <u>14</u>   | <u>10</u>  | <b>136</b>  | 47          | 26.9               |
| Hemoglobin Chain A (pdb 1BZ1 A; 8986)                                        | 9           | 2          | <b>82</b>   | <b>67</b>   | 20.5               |
| Inter-alpha-trypsin inhibitor H1 (sp P19827 ITIH1_HUMAN; 18030)              | <b>30</b>   | 2          | <b>81</b>   | <b>35</b>   | 20.5               |
| Leucine-rich alpha-2-glycoprotein (sp P02750 A2GL_HUMAN; 12187)              | <b>2</b>    | <u>1</u>   | <b>11</b>   | <u>2</u>    | 20.1               |
| Hemopexin (sp P02790 HEMO_HUMAN; 3985)                                       | <u>74</u>   | <u>37</u>  | <b>290</b>  | 93          | 16.5               |
| Coagulation factor XII (Hageman factor) (HAF) (sp P00748 FA12_HUMAN; 450519) | <b>6</b>    | <u>1</u>   | <b>6</b>    | <b>3</b>    | 14.5               |
| inter-alpha trypsin inhibitor H4 (ref NP_002209.2 ; 18032)                   | <b>34</b>   | 2          | <b>42</b>   | <b>23</b>   | 14.2               |
| Clusterin (Complement cytolysis inhibitor) (sp P10909 CLUS_HUMAN; 23971)     | <b>12</b>   | <u>7</u>   | <b>24</b>   | <b>12</b>   | 13.4               |
| Alpha-1-antichymotrypsin (sp P01011 AACT_HUMAN; 514677)                      | <u>28</u>   | 3          | <b>169</b>  | <u>29</u>   | 12.8               |
| Alpha-1-acid glycoprotein 1 (Orosomuroid-1) (sp P02763 A1AG1_HUMAN; 392774)  | <u>40</u>   | 10         | <b>249</b>  | <u>30</u>   | 12.0               |
| kininogen [Homo sapiens (gb AAB59550.1 ; 18800)                              | <u>18</u>   | <u>18</u>  | <b>44</b>   | <u>25</u>   | 9.8                |
| Ficolin-3 (sp O75636 FCN3_HUMAN; 488)                                        | <u>2</u>    | <u>1</u>   | <u>1</u>    | <u>2</u>    | 9.4                |
| Plasma protease C1 inhibitor (sp P05155 IC1_HUMAN; 4411)                     | <u>25</u>   | 3          | <b>40</b>   | <b>32</b>   | 9.0                |

**Table SIII. Calculated concentration (µg/ml serum) of proteins found in galectin-8N bound fractions<sup>a,b</sup>**

| <b>Protein</b>                                                                     | <b>H2</b> | <b>K2</b> | <b>P2</b>  | <b>P4</b> | <b>Av. % bound</b> |
|------------------------------------------------------------------------------------|-----------|-----------|------------|-----------|--------------------|
| Apolipoprotein B-100 (sp P04114 APOB_HUMAN; 392798)                                | <u>62</u> | 7         | <b>90</b>  | <b>95</b> | 8.8                |
| Carboxypeptidase N (sp P22792 CPN2_HUMAN; 448313)                                  | <u>1</u>  | 0         | <b>4</b>   | <u>2</u>  | 8.4                |
| Haptoglobin-related protein (sp P00739 HPTR_HUMAN; 444785)                         | <u>3</u>  | 0         | <b>6</b>   | <b>4</b>  | 8.1                |
| Lumican (Keratan sulfate proteoglycan lumican) (sp P51884 LUM_HUMAN; 6341)         | <u>2</u>  | <u>1</u>  | <b>8</b>   | <u>4</u>  | 7.8                |
| Alpha-2-HS-glycoprotein (Fetuin-A) (sp P02765 FETUA_HUMAN; 392812)                 | <u>41</u> | 8         | <b>82</b>  | <u>54</u> | 7.6                |
| Apolipoprotein E (sp P02649 APOE_HUMAN; 13190)                                     | <b>6</b>  | 0         | <b>4</b>   | 1         | 7.3                |
| Vitamin K-dependent protein S (sp P07225 PROS_HUMAN; 18160)                        | <u>2</u>  | <u>1</u>  | <u>2</u>   | <u>2</u>  | 6.7                |
| Fibronectin (sp P02751 FINC_HUMAN; 392799)                                         | <u>17</u> | 5         | <u>13</u>  | <u>14</u> | 5.3                |
| C4b-binding protein alpha chain (sp P04003 C4BP_HUMAN; 2283)                       | <u>21</u> | <u>14</u> | <u>20</u>  | <u>19</u> | 5.0                |
| Alpha-1-acid glycoprotein 2 (AGP 2) (Orosomuroid-2) (sp P19652 A1AG2_HUMAN; 25282) | <u>27</u> | 6         | <b>72</b>  | 16        | 5.0                |
| Apolipoprotein D (sp P05090 APOD_HUMAN; 25779)                                     | <u>7</u>  | 2         | <u>11</u>  | <u>5</u>  | 4.5                |
| Apolipoprotein A-I (sp P02647 APOA1_HUMAN; 5182)                                   | <u>75</u> | 6         | <u>117</u> | 42        | 4.3                |
| Complement C9 (sp P02748 CO9_HUMAN; 20011)                                         | <u>1</u>  | <u>1</u>  | <b>6</b>   | 0         | 4.0                |
| Alpha-1-microglobulin (Protein HC) (sp P02760 AMBP_HUMAN; 25278)                   | <u>5</u>  | 0         | <u>18</u>  | <u>10</u> | 3.8                |
| Vitronectin (sp P04004 VTNC_HUMAN; 10553)                                          | <u>6</u>  | 3         | <u>9</u>   | <u>6</u>  | 3.0                |
| Ceruloplasmin (sp P00450 CERU_HUMAN; 392776)                                       | <u>6</u>  | 0         | <u>17</u>  | 1         | 2.9                |
| Alpha-1-antitrypsin (sp P01009 A1AT_HUMAN; 8021)                                   | <u>22</u> | 6         | <u>48</u>  | <u>36</u> | 2.5                |
| Complement C1s (sp P09871 C1S_HUMAN; 445996)                                       | 1         | <u>2</u>  | <u>3</u>   | <u>2</u>  | 2.5                |
| Plasminogen (sp P00747 PLMN_HUMAN; 22361)                                          | 2         | 2         | <u>7</u>   | 2         | 2.3                |
| Complement factor H Isoform 1 (IPI00029739.5 SW; 17220796)                         | <u>8</u>  | 3         | <u>15</u>  | 6         | 2.0                |
| Histidine-rich glycoprotein (sp P04196 HRG_HUMAN; 18798)                           | 0         | 0         | <u>4</u>   | 2         | 1.6                |

**Table SIII. Calculated concentration ( $\mu\text{g}/\text{ml}$  serum) of proteins found in galectin-8N bound fractions<sup>a,b</sup>**

| <b>Protein</b>                                               | <b>H2</b> | <b>K2</b> | <b>P2</b> | <b>P4</b> | <b>Av. % bound</b> |
|--------------------------------------------------------------|-----------|-----------|-----------|-----------|--------------------|
| Prothrombin (sp P00734 THRB_HUMAN; 392792)                   | <u>4</u>  | 0         | 3         | 3         | 1.5                |
| Angiotensinogen (sp P01019 ANGT_HUMAN; 2480)                 | 1         | 0         | <u>2</u>  | 1         | 1.5                |
| Apolipoprotein C-III (sp P02656 APOC3_HUMAN; 5181)           | <u>11</u> | 0         | 9         | 8         | 1.4                |
| Apolipoprotein A-II (sp P02652 APOA2_HUMAN; 1875)            | 10        | 2         | 14        | 8         | 0.6                |
| Serum albumin (sp P02768 ALBU_HUMAN; 19284)                  | 11        | 201       | 148       | 198       | 0.3                |
| Apolipoprotein C-II (sp P02655 APOC2_HUMAN; 13193)           | 4         | 0         | 0         | 1         | 0.2                |
| Complement C4-B (sp P0COL5 CO4B_HUMAN; 392823)               | 3         | 0         | 2         | 2         | 0.2                |
| Serotransferrin (Transferrin) (sp P02787 TRFE_HUMAN; 388655) | 8         | 2         | 2         | 2         | 0.2                |
| Complement C1r (unkn P00736 C1R_HUMAN; 17982011)             | 2         | 2         | 8         | 3         | 0.0                |

a) The total protein concentration was measured by protein assay and IgA by ELISA. The quantitative distribution of other proteins, except immunoglobulins, within the remainder (Total - IgA) was estimated from their signal intensities in mass spectrometry. The amount of immunoglobulins was estimated by comparing the MS1 signal for their heavy chain constant region to the corresponding signal from IgA1.

b) The % bound of each protein was estimated by dividing the bound amount with the total amount known in serum as measured by ELISA here for IgA and for other proteins from Farrah et al. 2010. Bold format indicates clear significant binding (> 10%), underlined format indicates low but probably significant binding (2-10%) and no formatting indicates uncertain low or no binding (< 2%).
